# Supplementary material for: Synthesis, structural characterization, physicochemical properties and transformations of dehydroevodiamine and its hydrochloride salts
Source: Royal Society of Chemistry journal article supplement (doi:10.1039/d0ce00136h), 2020-01-01
Supplement: d0ce00136h1.pdf [file d0ce00136h1.pdf]

## Electronic Supplementary Information

1

2

3

4

5

6

7

8

# Synthesis, Structural Characterization, Physicochemical Properties and Transformations of Dehydroevodiamine and Its Hydrochloride Salts

Guoshun Zhang,<sup>a#</sup> Xiaoqing Shang,<sup>a#</sup> Wei Han,<sup>b</sup> Lifeng Zhang,<sup>a</sup> Guolian Ren<sup>a</sup> and Shuqiu Zhang\*<sup>a</sup>

<sup>a</sup>Department of Pharmacy, Shanxi Medical University, Taiyuan 030001, China, *E-mail*: [shuqiu.zhang@126.com](mailto:shuqiu.zhang@126.com)

<sup>b</sup>Department of Pharmacy, Shanxi health Vocational College, Taiyuan 030001, China

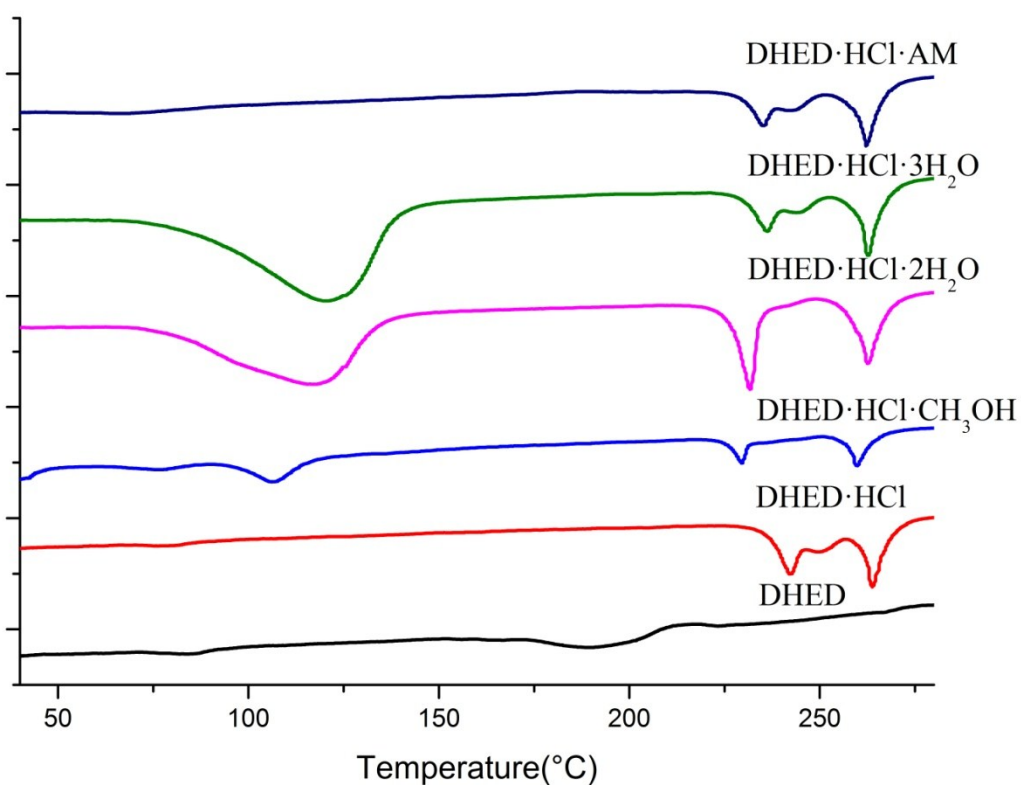

9

10

**Figure 1** DSC profiles of six kinds of the DHED related solid forms

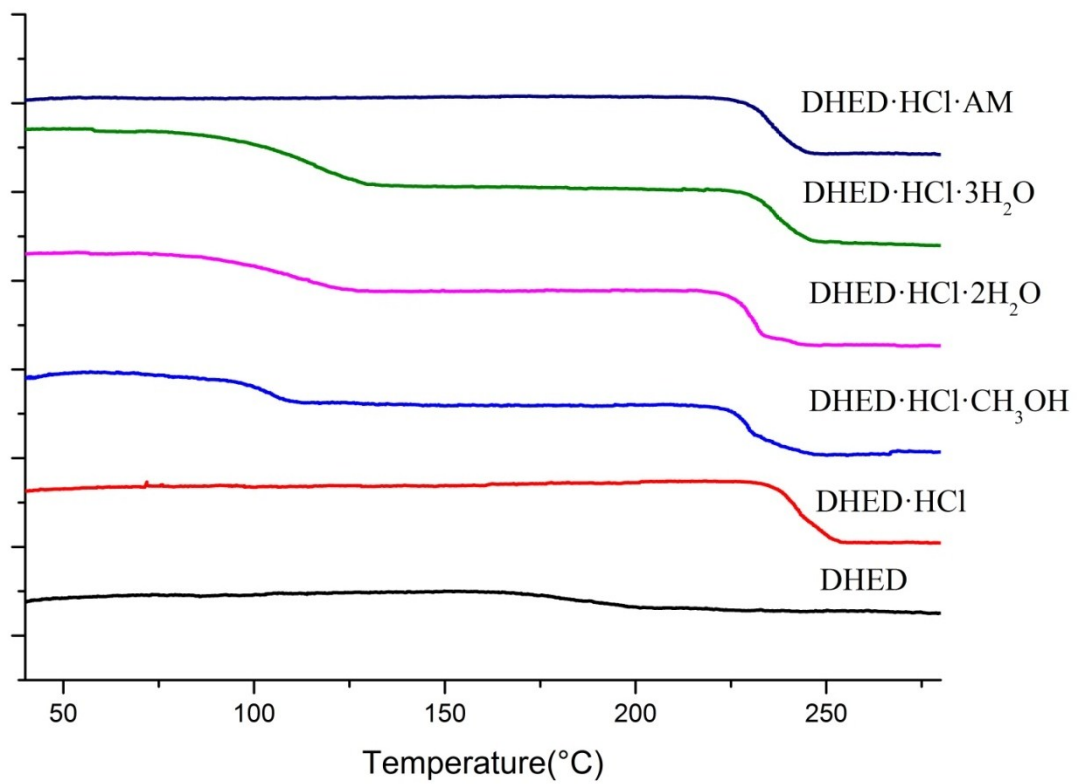

11  
12  
13  
14  
15

**Figure 2** TGA profiles of six kinds of the DHED related solid forms

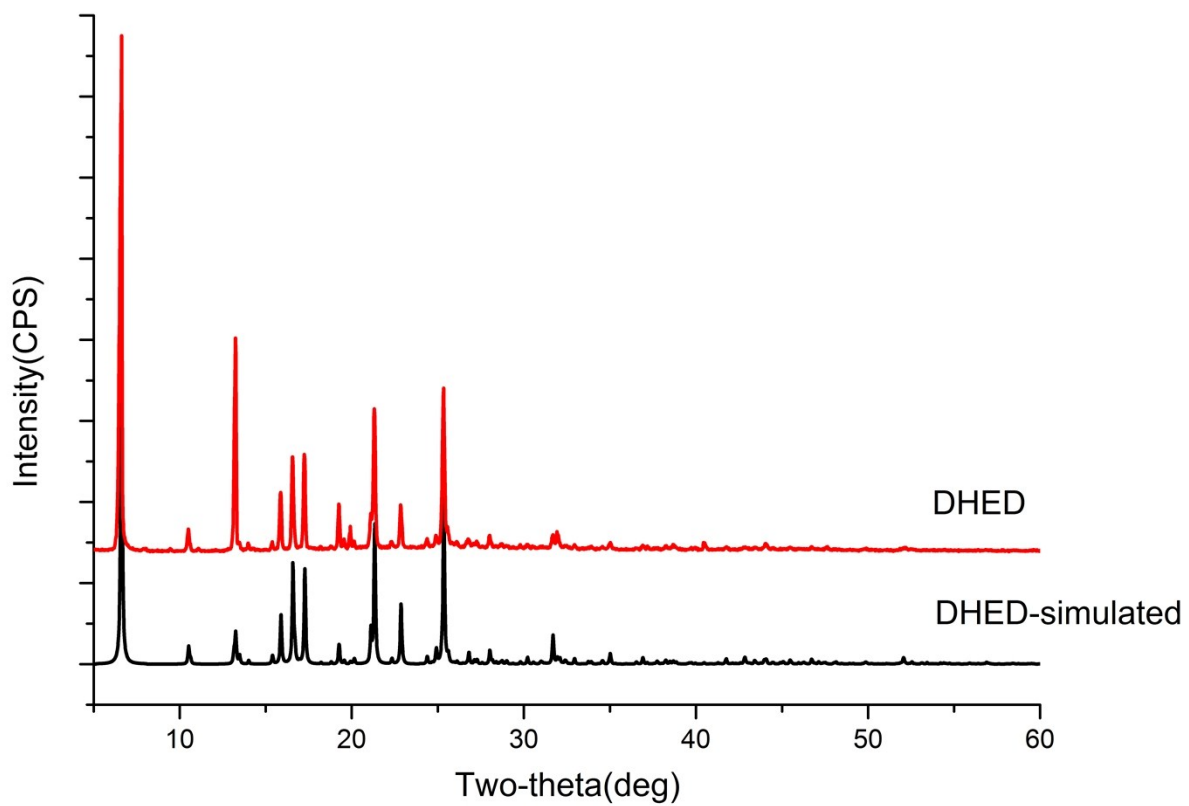

**Figure 3** The experiment and calculated XRPD patterns of DHED

16  
17  
18  
19  
20

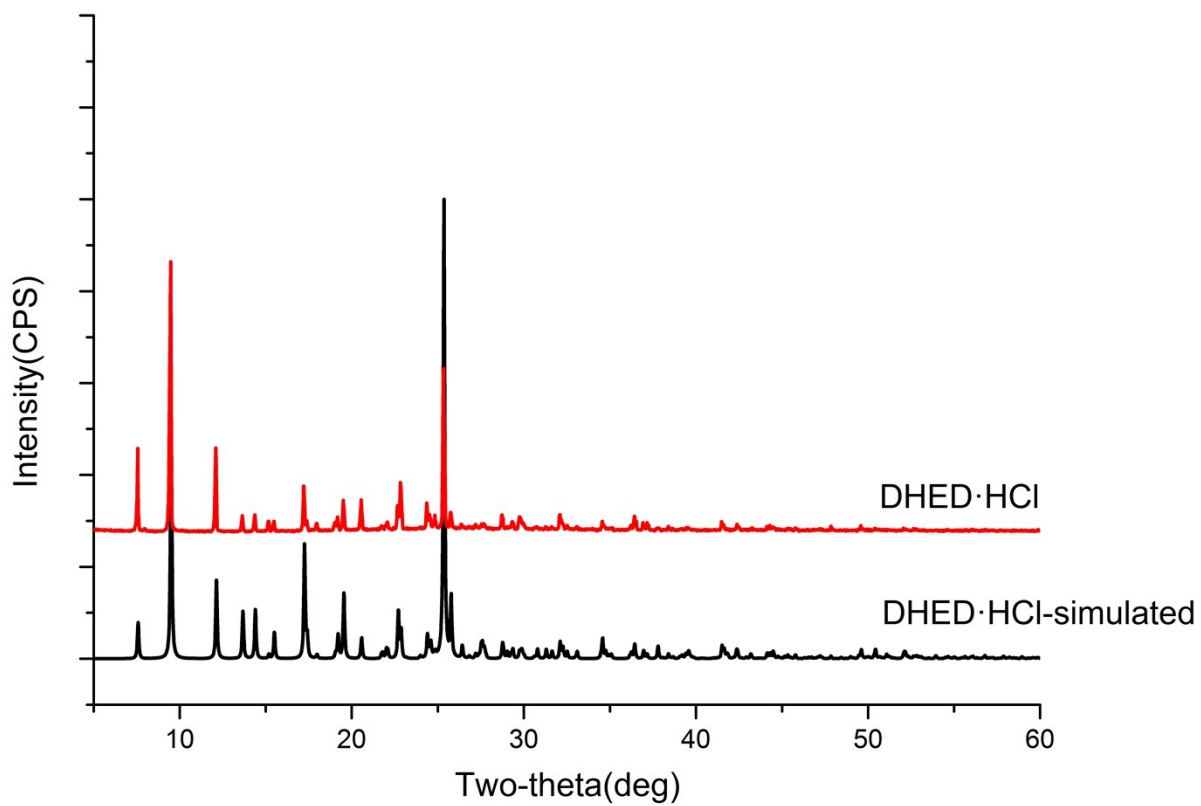

**Figure 4** The experiment and calculated XRPD patterns of DHED·HCl

21  
22  
23  
24

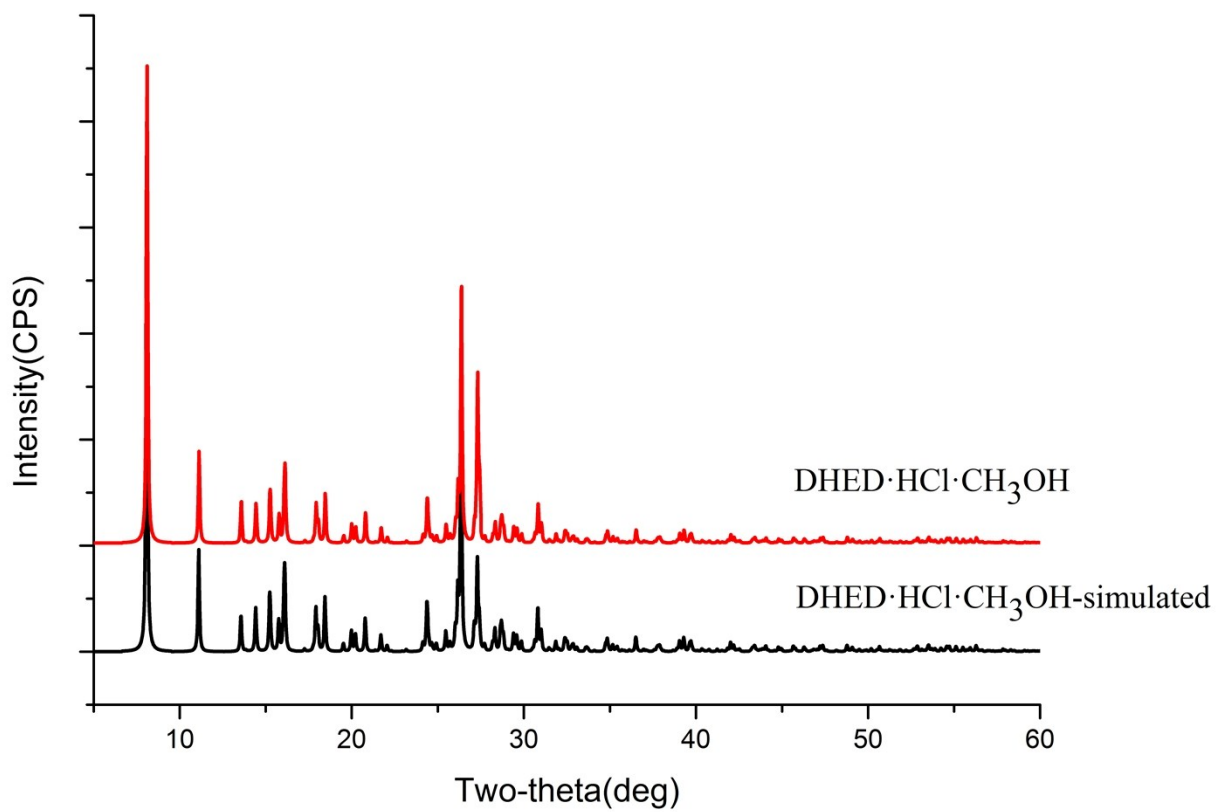

25  
26  
27  
28  
29

**Figure 5** The experiment and calculated XRPD patterns of DHED·HCl·CH<sub>3</sub>OH

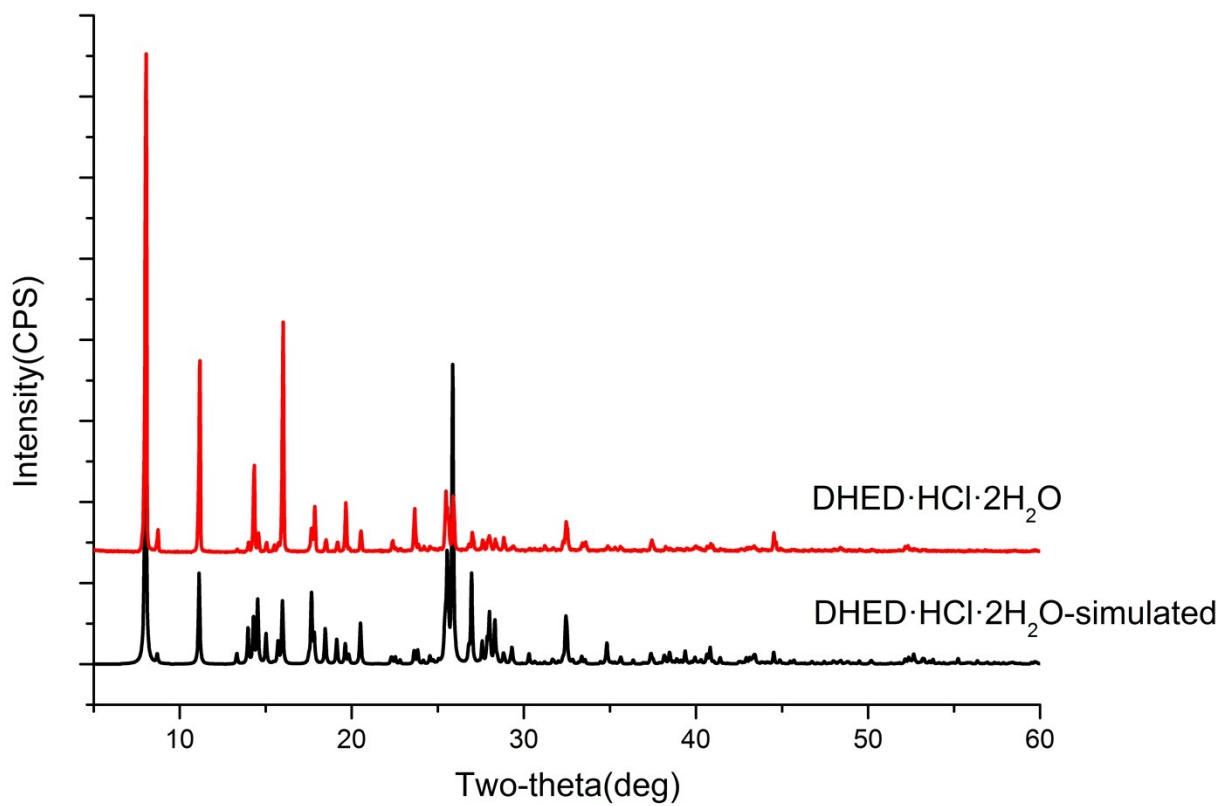

**Figure 6** The experiment and calculated XRPD patterns of DHED·HCl·2H<sub>2</sub>O

30  
31  
32  
33

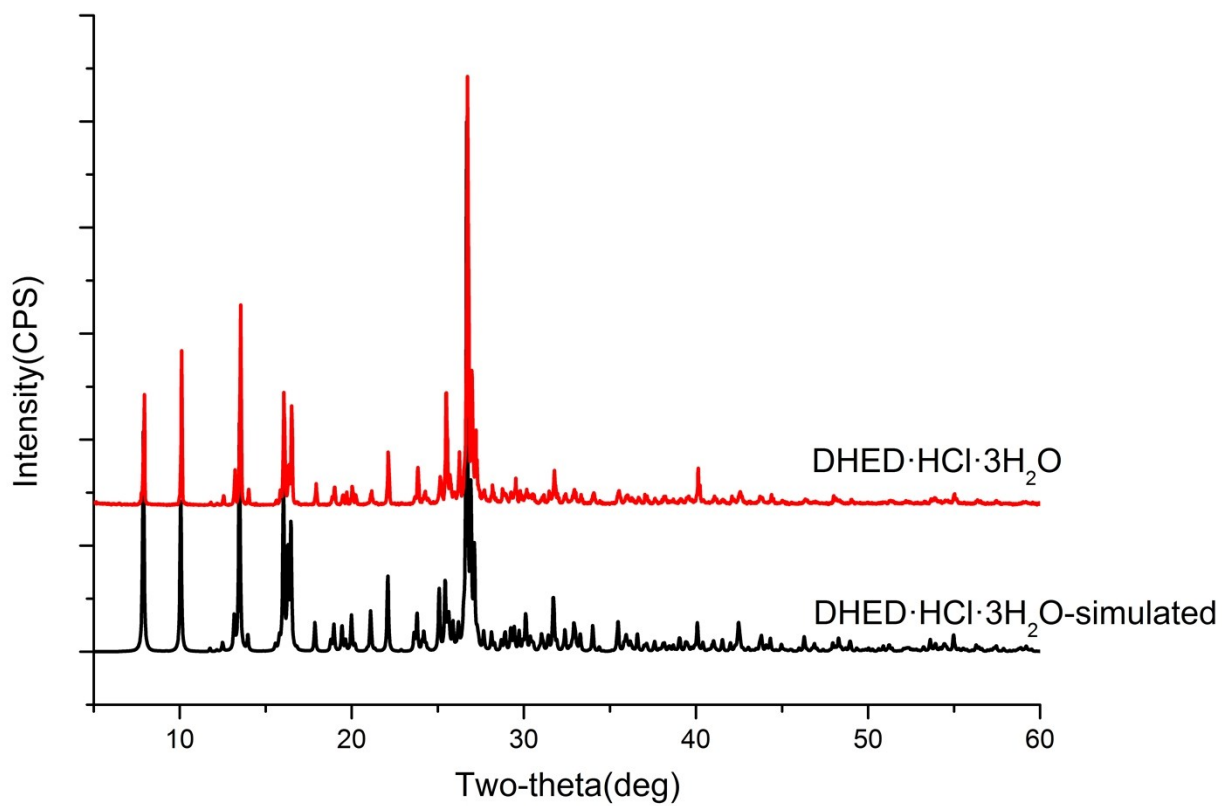

**Figure 7** The experiment and calculated XRPD patterns of DHED·HCl·3H<sub>2</sub>O

34  
35  
36

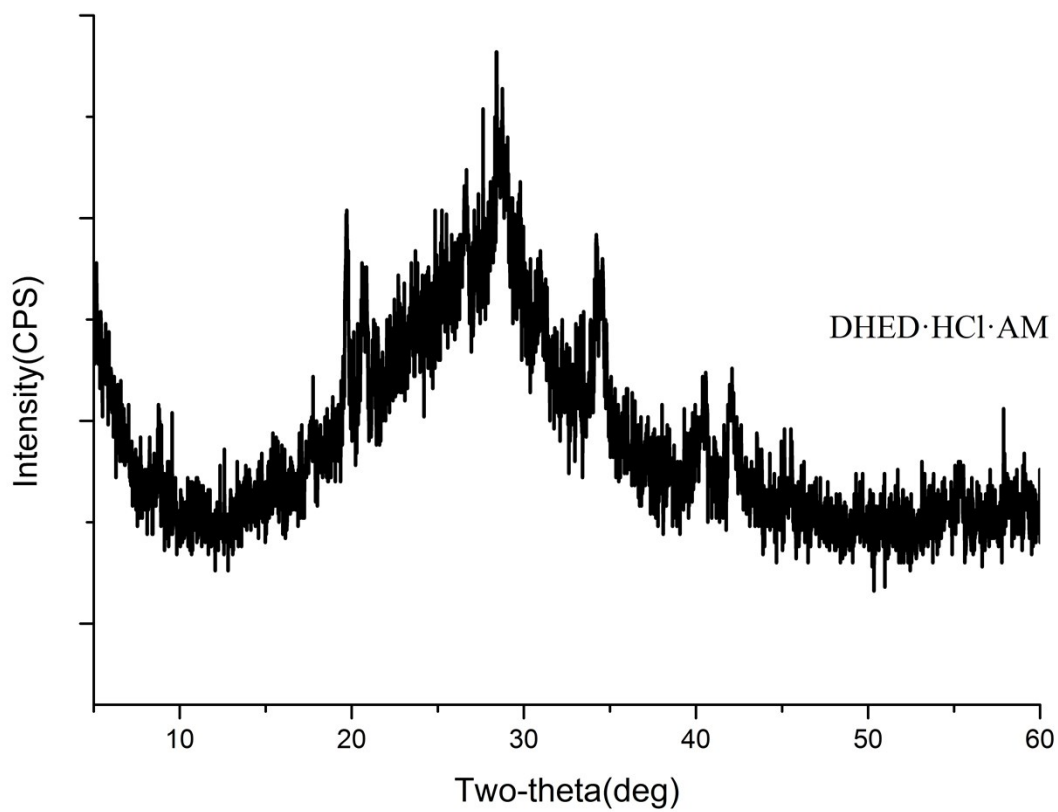

37  
38  
39

**Figure 8** The experiment XRPD pattern of DHED·HCl·AM



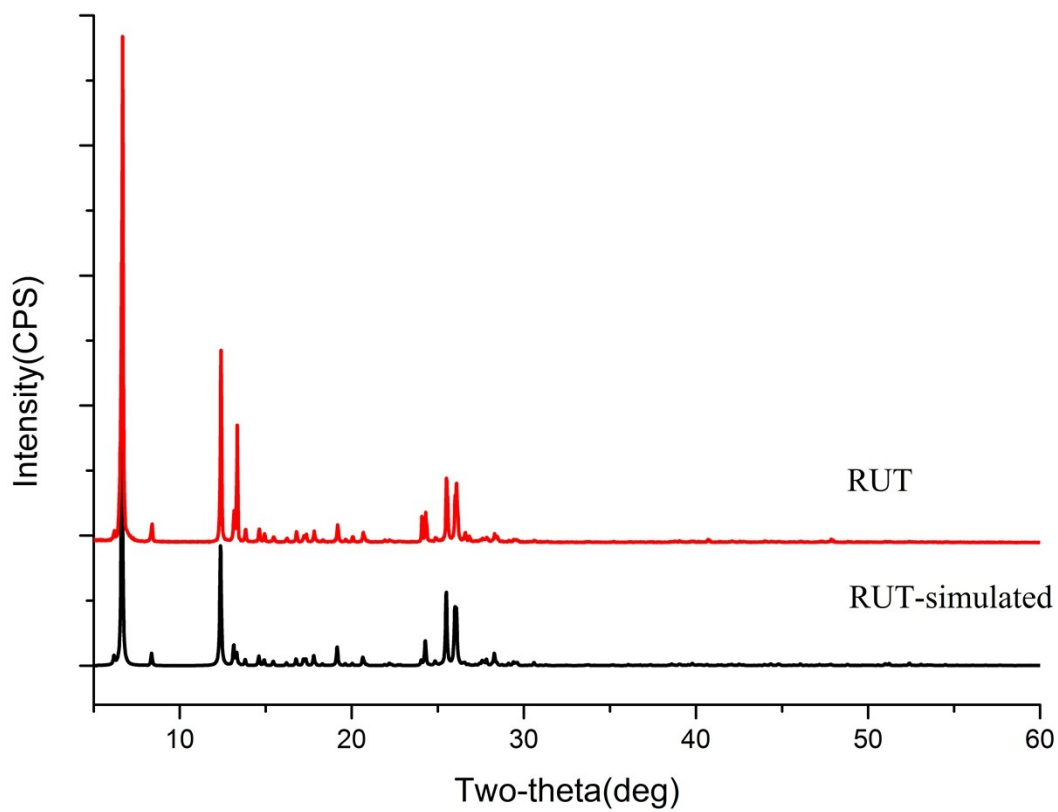

40  
41  
42

**Figure 9** The experiment and calculated XRPD patterns of RUT

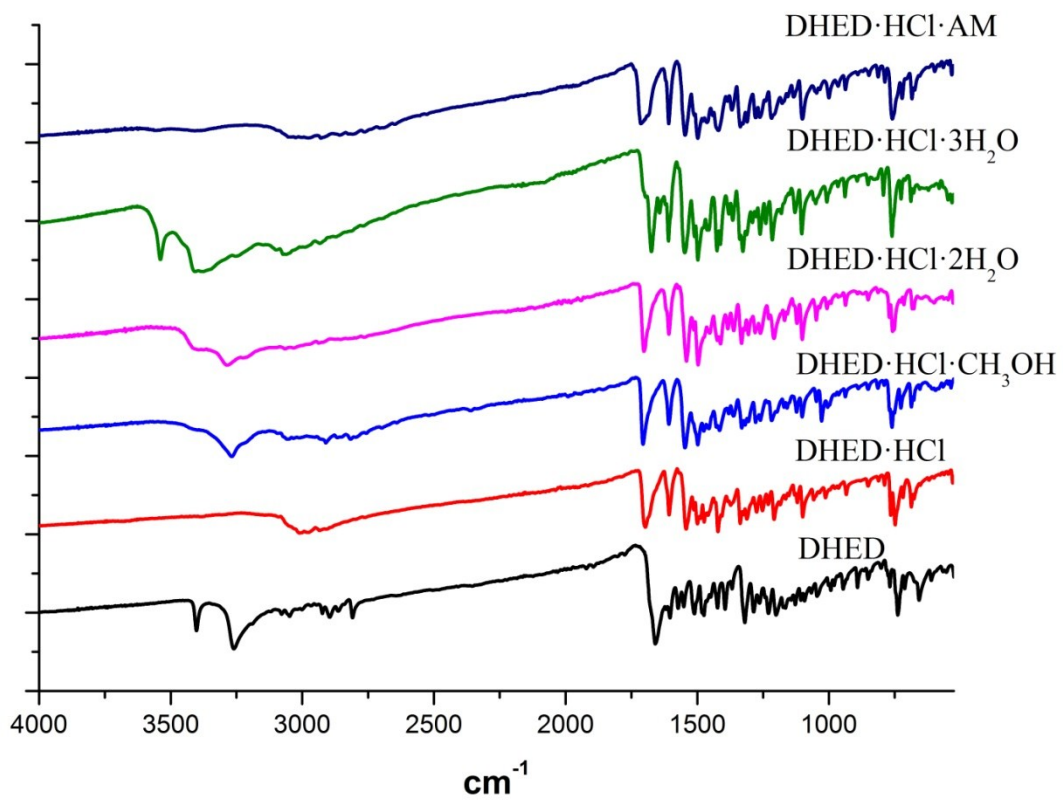

**Figure 10** FTIR profiles of six kinds of the DHED related solid forms

43  
44  
45

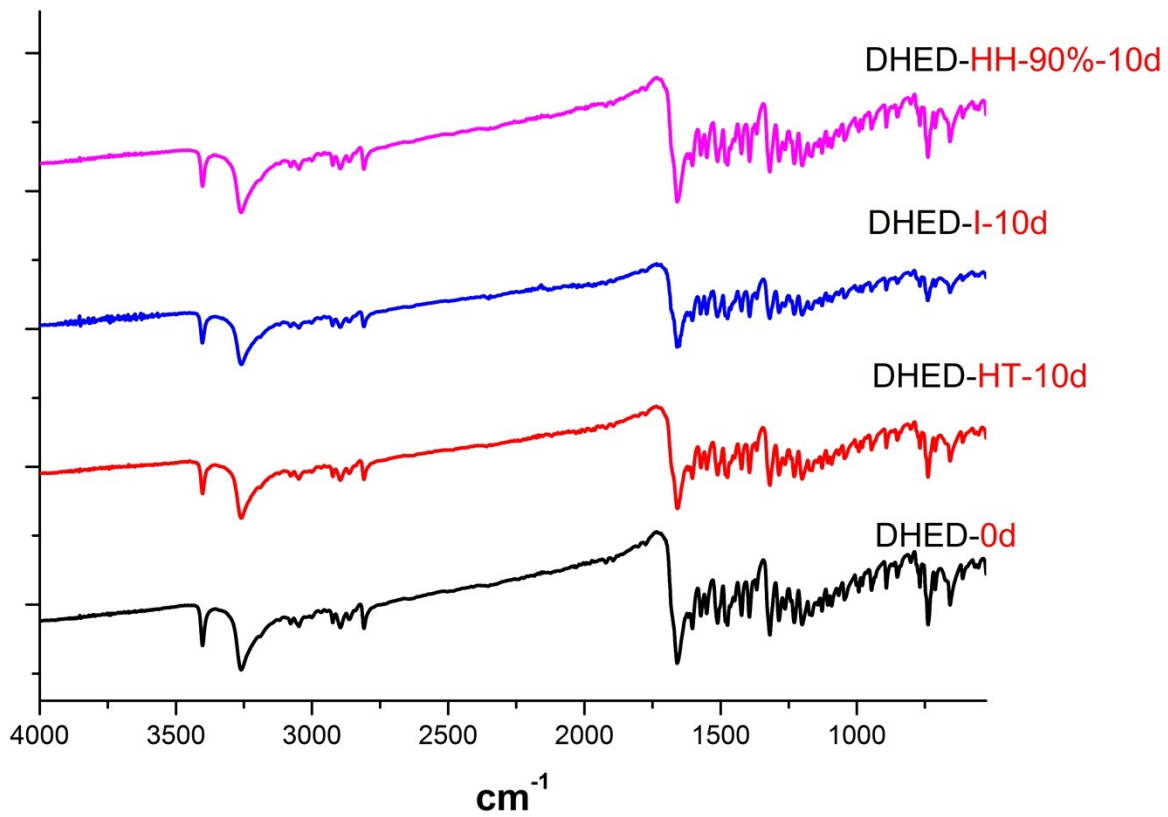

**Figure 11** FTIR profiles of stability of DHED

46  
47  
48

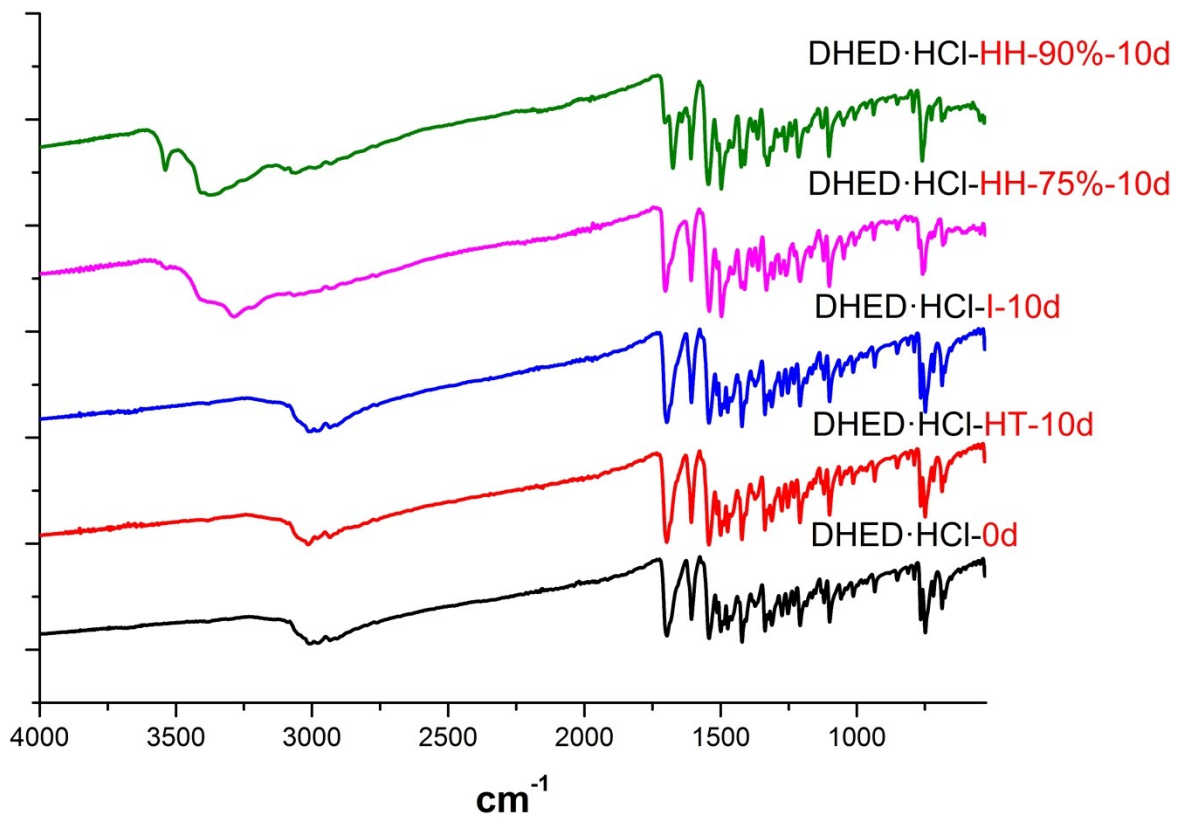

**Figure 12** FTIR profiles of stability of DHED·HCl

49  
50  
51

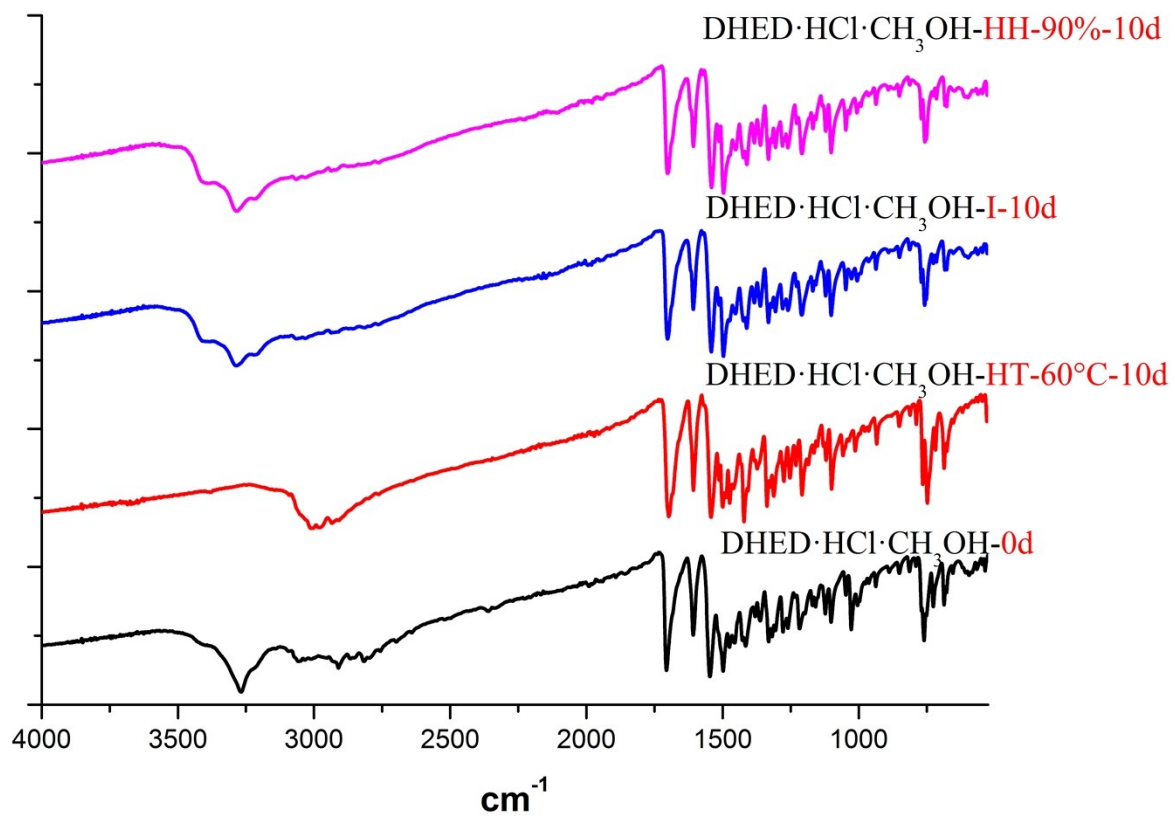

52  
53

**Figure 13** FTIR profiles of stability of DHED·HCl·CH<sub>3</sub>OH

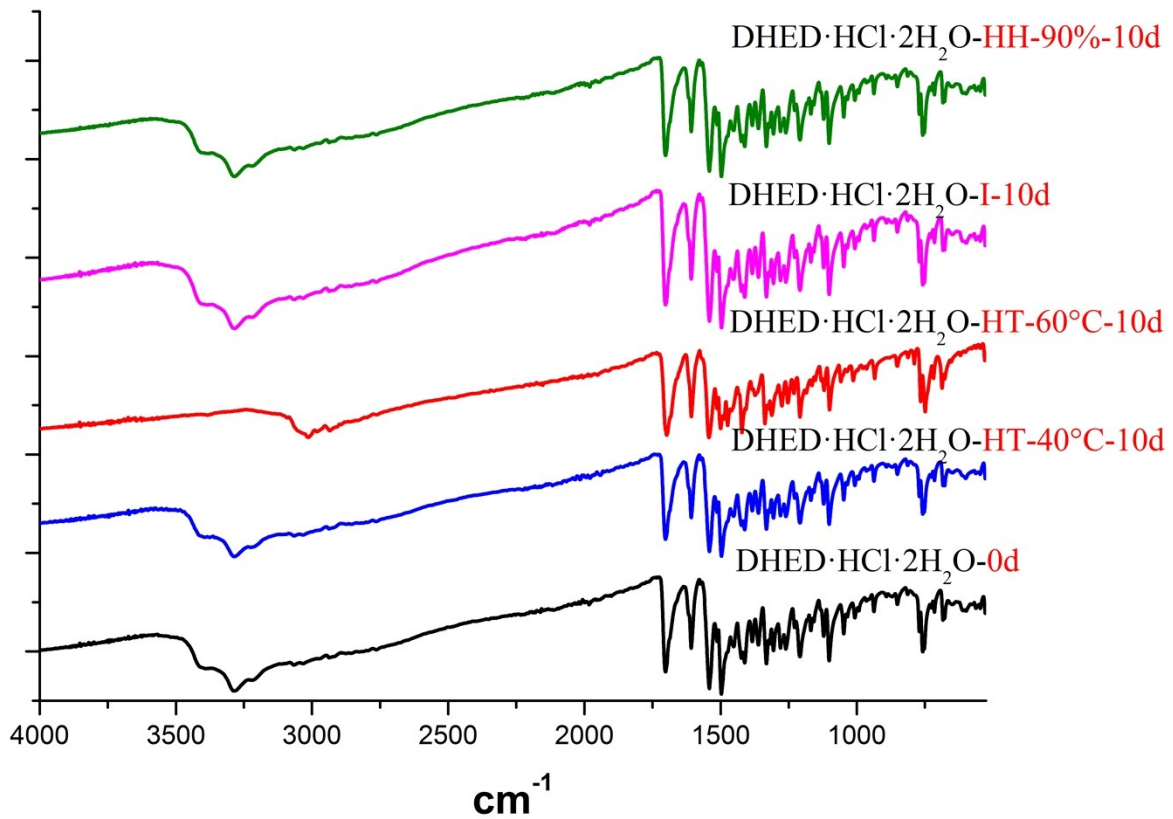

**Figure 14** FTIR profiles of stability of DHED·HCl·2H<sub>2</sub>O

54  
55  
56

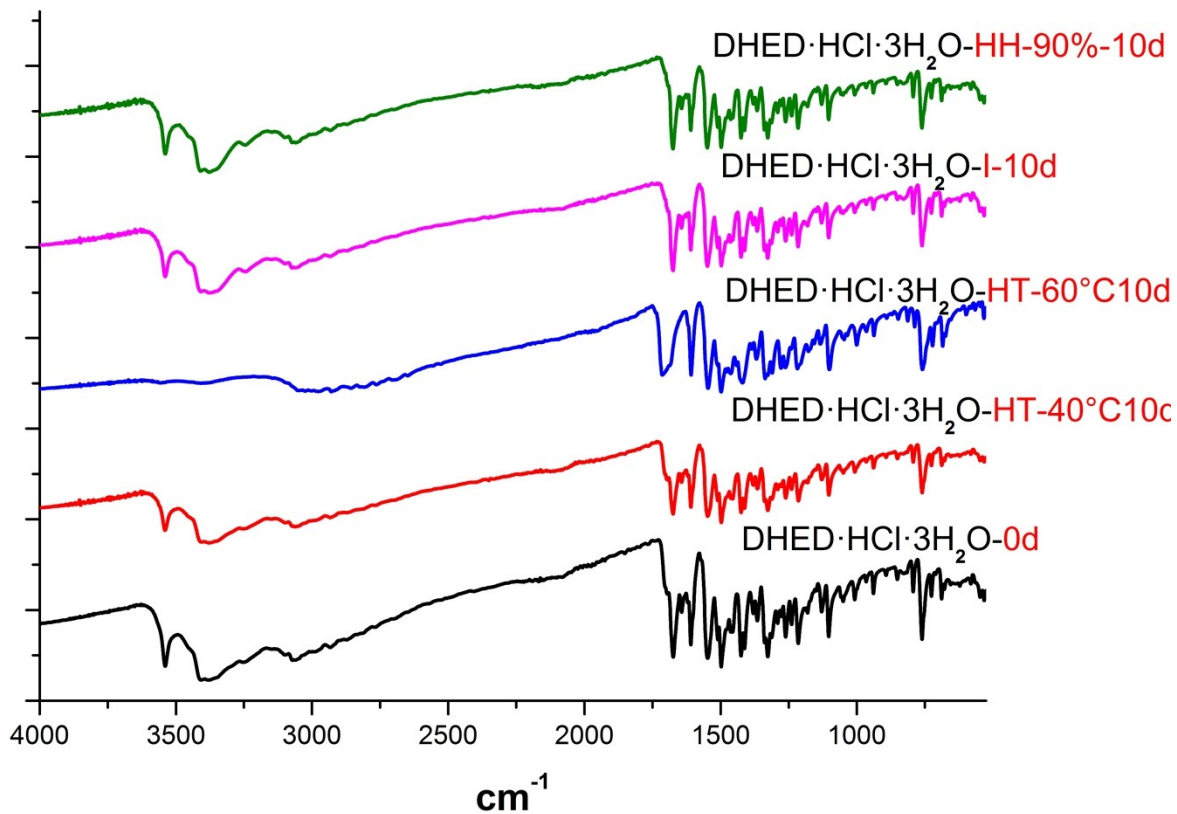

57  
58

**Figure 15** FTIR profiles of stability of DHED·HCl·3H<sub>2</sub>O

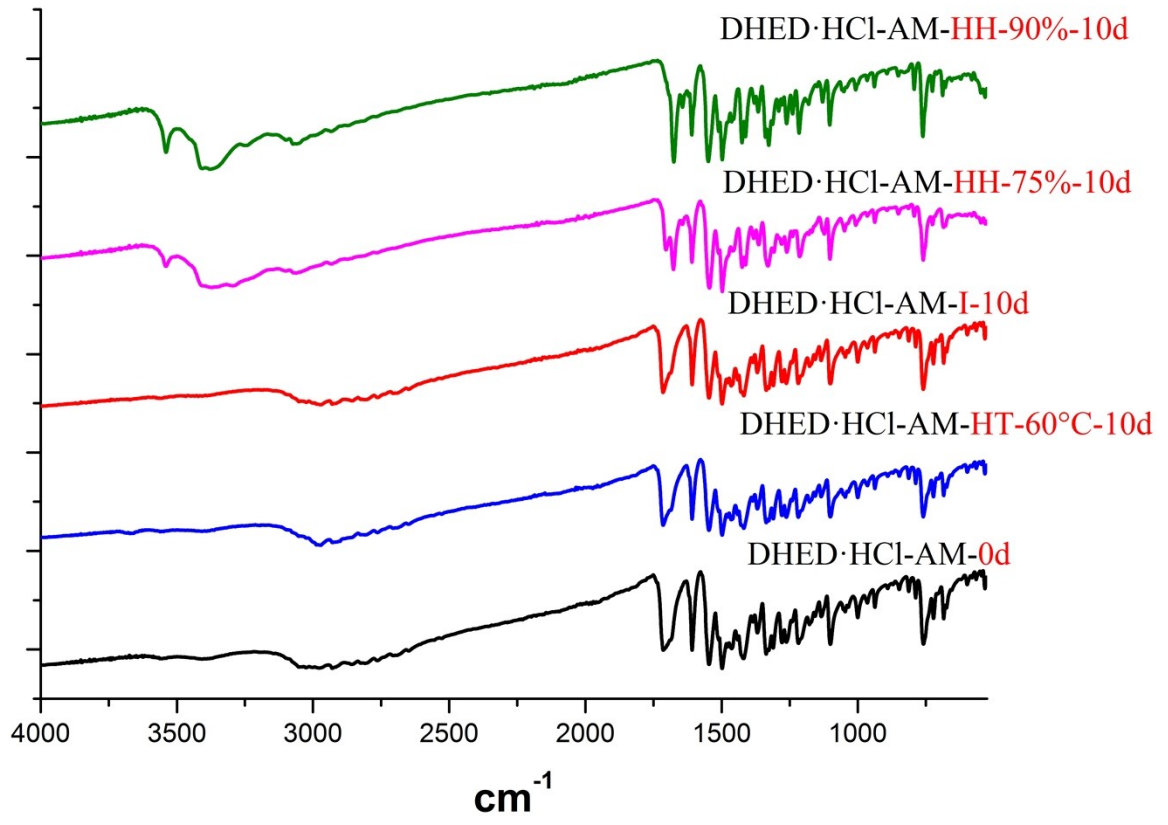

**Figure 16** FTIR profiles of stability of DHED·HCl-AM

59  
60  
61  
62  
63  
64  
65  
66



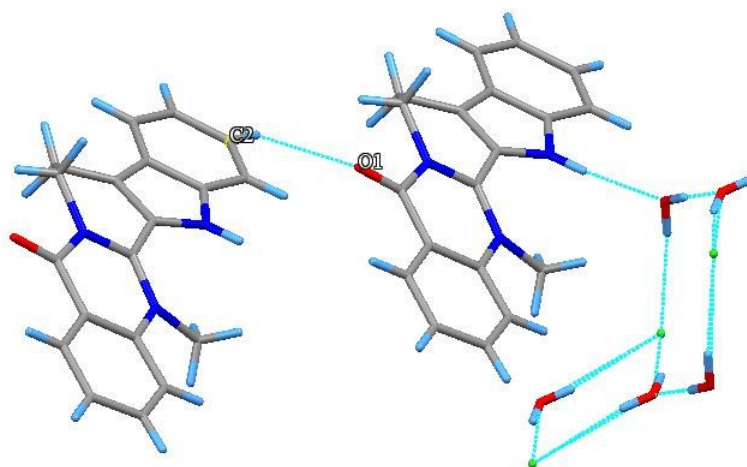

**Figure 17** O1 in DHED·HCl·2H<sub>2</sub>O involved in the weak hydrogen bond

67  
68  
69  
70  
71
